# Supplementary material for: Exploring Variations in STEM Instructors’ Approaches to Office Hours
Source: Atypon-hosted journal article supplement (doi:10.1187/cbe.24-03-0109), 2024-10-07
Supplement: combinedsupmats.pdf [file combinedsupmats.pdf]

# Supplemental Material

*CBE—Life Sciences Education*

Forsythe *et al.*

Interview Protocol for “Exploring variations in STEM instructors’ approaches to office hours”

1. What do you view as the goal or purpose of office hours?
2. Why do you think students attend your office hours?
3. Why do you think some of your students do not attend your office hours?
4. Can you describe your typical office hours? Where are they held (online, in person, conference room, office, etc.?)
5. Can you describe what a successful session of office hours looks like?
6. Have you ever had experiences with an unsuccessful session of office hours? Can you describe what this looks like?
  - a. Have you ever had any office hours that had students present where you feel the office hours session did not go well?
7. Have you changed your approach or perspectives to office hours over your teaching career?
8. If at all, how does your identity shape your interactions with students in office hours?
9. What strategies, if any, have you used to increase attendance at office hours?
10. What approaches, if any, have you used to improve student experiences in office hours?
  - a. Have you implemented any strategies to make students feel more included at office hours?
11. Are there any resources that would help improve your office hours?
12. Is there anything else you would like to share about your experiences with office hours?
